# Supplementary material for: Integrative mixture of experts to combine clinical factors and gene markers
Source: PubMed Central journal article supplement — Bioinformatics. 2010 Mar 11;26(9):1192–8. doi: 10.1093/bioinformatics/btq107 (PMC2859127; doi:10.1093/bioinformatics/btq107), 2010-03-11
Supplement: btq107_1.pdf [file btq107_1.pdf]

# Supplemental material S1: Integrative mixture of experts to combine clinical factors and gene markers

## 1 Methods

### 1.1 Parameter estimation via the EM algorithm

To apply the EM algorithm to the ME architecture, we introduce the indicator variables  $\zeta_{hj}$ , where  $\zeta_{hj}$  is one if  $y_j$  belongs to the  $h^{\text{th}}$  expert or zero otherwise.

The complete data likelihood for  $\Psi$  is given by

$$\log L_c(\Psi) = \sum_{j=1}^n \sum_{h=1}^H \zeta_{hj} \{ \log \pi_h + \log f_h^G(\mathbf{w}_j; \boldsymbol{\alpha}_h) + \log f_h^E(y_j | \mathbf{w}_j; \boldsymbol{\beta}_h) \} \quad (1)$$

When we apply the EM algorithm to train the ME architecture, the E-step calculates the  $Q$ -function on the  $(k+1)^{\text{th}}$  iteration as

$$\begin{aligned} Q(\Psi; \Psi^{(k)}) &= \mathbb{E}_{\Psi^{(k)}} \{ \log L_c(\Psi) | \mathbf{y}, \mathbf{w} \} \\ &= \sum_{j=1}^n \sum_{h=1}^H \mathbb{E}_{\Psi^{(k)}} (\zeta_{hj} | \mathbf{y}, \mathbf{w}) \{ \log \pi_h + \log f_h^G(\mathbf{w}_j; \boldsymbol{\alpha}_h) \\ &\quad + \log f_h^E(y_j | \mathbf{w}_j; \boldsymbol{\beta}_h) \}. \end{aligned} \quad (2)$$

As (2) is linear in  $\zeta_{hj}$ , the E-step replaces  $\zeta_{hj}$  in (1) by its current conditional expectation  $\tau_{hj}^{(k)}$  given  $y_j, \mathbf{w}_j$  and the current estimate  $\Psi^{(k)}$  for  $\Psi$ , where

$$\begin{aligned} \tau_{hj}^{(k)} &= Pr_{\Psi^{(k)}} (\zeta_{hj} = 1 | y_j, \mathbf{w}_j) \\ &= \pi_h^k \frac{f_h^G(\mathbf{w}_j; \boldsymbol{\alpha}_h) f_h^E(y_j | \mathbf{w}_j; \boldsymbol{\beta}_h)}{\sum_{l=1}^H f_l^G(\mathbf{w}_j; \boldsymbol{\alpha}_l) f_l^E(y_j | \mathbf{w}_j; \boldsymbol{\beta}_l)}, \quad h = 1 \dots H. \end{aligned} \quad (3)$$

The  $Q$  function can be decomposed into three terms with respect to the parameters  $\boldsymbol{\pi}_h, \boldsymbol{\alpha}_h$  and

$\beta_h$  to be estimated in the M-step:

$$Q_\pi = \sum_{j=1}^n \sum_{h=1}^H \tau_{hj}^{(k)} \log \pi_h, \quad (4)$$

$$Q_\alpha = \sum_{j=1}^n \sum_{h=1}^H \tau_{hj}^{(k)} \log f_h^G(\mathbf{w}_j; \alpha_h), \quad (5)$$

$$Q_\beta = \sum_{j=1}^n \sum_{h=1}^H \tau_{hj}^{(k)} \log f_h^E(y_j | \mathbf{w}_j; \beta_h). \quad (6)$$

By maximizing the decomposed  $Q$  functions separately in the M-step, one can obtain the updated estimates of  $\pi$ ,  $\alpha$  and  $\beta$ .

## 1.2 ME networks in practice

The initial estimates of  $\mu_h$ ,  $\Sigma_h$  and  $\pi_h$  ( $h = 1, \dots, H$ ) are given by the  $k$ -means clustering algorithm on the microarray data, with  $k = H$ .

The number of experts  $H$  can be tuned by computing the index

$$I_h = \sum_{j=1}^n \zeta_{hj} / n \simeq \sum_{j=1}^n \tau_{hj} / n, \quad h = 1, \dots, H.$$

According to Jacobs *et al.* (1997), the number of experts to choose is the minimum value of  $H$  for which the sum of the largest indices exceeds 0.8. In practice, in our binary context, we always found that  $H = 2$ . In fact, many authors already found that the optimal number of experts can often be set to the number of classes (Ubeyli, 2005; Ng and McLachlan, 2007; Gormley *et al.*, 2009).

## 1.3 Maximization of the $Q$ -function for the ME model

**Common unknown parameters for all models.** These parameters to estimate are  $\pi_h$  and  $\beta_h$  in (1), for  $h = 1, \dots, H$ .

In the E-step,  $\tau_{hj}^{(k)}$  is computed using  $f_h^G(\mathbf{w}_j; \alpha_h^{(k)})$ , which is replaced by (3) using the current estimate  $\alpha^{(k)}$ .

In the M-step, maximizing  $Q_\pi$  gives:

$$\pi_h^{(k+1)} = \sum_{j=1}^n \tau_{hj}^{(k)} / n.$$

The weight vector  $\beta_h^{(k+1)}$  in (1) is updated by solving  $H$  nonlinear equations using the MINPACK Fortran routine:

$$\sum_{j=1}^n \tau_{hj}^{(k)} \left( y_j - \frac{\exp(\beta_h^{(k)T} \mathbf{w}_j)}{1 + \exp(\beta_h^{(k)T} \mathbf{w}_j)} \right) \mathbf{w}_j = 0$$

The parameter  $\alpha_h^{(k+1)}$  is estimated by maximizing  $Q_\alpha$  for the different types of model that we use, as described below.

**Independence model.** The vector of unknown parameters  $\alpha_h$  consists of  $\lambda_{hil}$  ( $i = 1, \dots, q; l = 1, \dots, n_i - 1$ ), and the elements of  $\mu_h$  and  $\Sigma_h$ , ( $h = 1, \dots, H$ ).

$$\lambda_{hil}^{(k+1)} = \frac{\sum_{j=1}^n \tau_{hj}^{(k)} \delta(z_{ij}, l)}{\sum_{j=1}^n \tau_{hj}^{(k)}},$$

where  $\delta(z_{ij}, l) = 1$  if  $z_{ij} = l$  and is zero otherwise,  $l = 1, \dots, n_i$ .

The elements  $\mu_h$  and  $\Sigma_h$  are updated as follows:

$$\mu_h^{(k+1)} = \frac{\sum_{j=1}^n \tau_{hj}^{(k)} \mathbf{x}_j}{\sum_{j=1}^n \tau_{hj}^{(k)}},$$

$$\Sigma_h^{(k+1)} = \frac{\sum_{j=1}^n \tau_{hj}^{(k)} (\mathbf{x}_j - \mu_h^{(k)}) (\mathbf{x}_j - \mu_h^{(k)})^T}{\sum_{j=1}^n \tau_{hj}^{(k)}}.$$

**Location model.** The vector of unknown parameters  $\alpha_h$  consists of  $p_{hs}$  ( $s = 1, \dots, S$ ) and the elements of  $\mu_h$  and  $\Sigma_h$  ( $h = 1, \dots, H$ ). These parameters are estimated as follows:

$$p_{hs}^{(k+1)} = \frac{\sum_{j=1}^n \tau_{hj}^{(k)} \delta(j, s)}{\sum_{j=1}^n \tau_{hj}^{(k)}},$$

where  $\delta(j, s) = 1$  if  $z_{ij} = s$  and is zero otherwise. The elements  $\mu_h$  and  $\Sigma_h$  are updated as follows:

$$\mu_h^{(k+1)} = \frac{\sum_{j=1}^n \tau_{hj}^{(k)} \delta(j, s) \mathbf{x}_j}{\sum_{j=1}^n \tau_{hj}^{(k)} \delta(j, s)},$$

$$\Sigma_h^{(k+1)} = \frac{\sum_{j=1}^n \sum_{s=1}^S \delta(j, s) \tau_{hj}^{(k)} (\mathbf{x}_j - \mu_h^{(k)}) (\mathbf{x}_j - \mu_h^{(k)})^T}{\sum_{j=1}^n \tau_{hj}^{(k)}}.$$

**Multinomial logit model.** The vector of unknown parameters  $\alpha_h$  only consists of the variable weight vector  $\mathbf{v}_h$ , which is estimated via the IRLS algorithm outside the EM algorithm, see Jordan and Jacobs (1994).

## References

- Gormley, I., Murphy, T., *et al.* (2009). A mixture of experts model for rank data with applications in election studies. *Arxiv preprint arXiv:0901.4203*.
- Jacobs, R., Peng, F., and Tanner, M. (1997). A Bayesian approach to model selection in hierarchical mixtures-of-experts architectures. *Neural Networks*, **10**(2), 231–241.

- Jordan, M. and Jacobs, R. (1994). Hierarchical mixtures of experts and the EM algorithm. *Neural computation*, **6**(2), 181–214.
- Ng, S. and McLachlan, G. (2007). Extension of mixture-of-experts networks for binary classification of hierarchical data. *Artificial Intelligence in Medicine*, **41**(1), 57–67.
- Ubeyli, E. (2005). A mixture of experts network structure for breast cancer diagnosis. *Journal of medical systems*, **29**(5), 569–579.
