# Supplementary material for: Integrative mixture of experts to combine clinical factors and gene markers
Source: PubMed Central journal article supplement — Bioinformatics. 2010 Mar 11;26(9):1192–8. doi: 10.1093/bioinformatics/btq107 (PMC2859127; doi:10.1093/bioinformatics/btq107), 2010-03-11
Supplement: btq107_2.pdf [file btq107_2.pdf]

# Supplemental material S2: Integrative mixture of experts to combine clinical factors and gene markers

Kim-Anh Lê Cao<sup>1</sup>, Emmanuelle Meugnier,<sup>2</sup> and Geoffrey J. McLachlan<sup>1,3</sup>

## **Description of clinical factors**

Table 1: Prostate clinical factors

| Characteristic           | No. of samples | class 0 | class 1 |
|--------------------------|----------------|---------|---------|
|                          | 79             | 37      | 42      |
| serum PSA level          |                |         |         |
| 0-10                     | 50             | 19      | 31      |
| 10-20                    | 18             | 14      | 4       |
| 20+                      | 11             | 4       | 7       |
| Gleason stage            |                |         |         |
| 4-6                      | 17             | 3       | 14      |
| 7                        | 44             | 20      | 24      |
| 8-10                     | 18             | 14      | 4       |
| Extra capsular extension |                |         |         |
| Established              | 38             | 24      | 14      |
| Focal                    | 6              | 5       | 1       |
| Invasive                 | 18             | 6       | 12      |
| None                     | 17             | 2       | 15      |
| Surgical Margin          |                |         |         |
| Negative                 | 29             | 7       | 22      |
| Positive                 | 50             | 30      | 20      |
| Seminal vesicle invasion |                |         |         |
| No                       | 69             | 28      | 41      |
| Yes                      | 10             | 9       | 1       |
| Lymph node involmment    |                |         |         |
| Negative                 | 76             | 34      | 41      |
| Positive                 | 3              | 3       | 0       |
| TNM                      |                |         |         |
| T1C                      | 34             | 16      | 18      |
| T2A2B                    | 16             | 9       | 7       |
| T2B                      | 20             | 7       | 13      |
| T2C                      | 7              | 3       | 4       |
| T3A                      | 2              | 2       | 0       |
| age                      |                |         |         |
| 55-                      | 15             | 2       | 13      |
| 55-65                    | 40             | 22      | 18      |
| 65 +                     | 24             | 13      | 11      |

Table 2: Breast clinical factors

| Characteristic            | No. of samples | class 1 | class 0 |
|---------------------------|----------------|---------|---------|
|                           | 256            | 181     | 75      |
| Age                       |                |         |         |
| < 40                      | 59             | 33      | 26      |
| 40-44                     | 24             | 18      | 6       |
| 45-49                     | 82             | 59      | 23      |
| $\geq 50$                 | 91             | 71      | 20      |
| No. Positive nodes        |                |         |         |
| 0                         | 33             | 18      | 15      |
| 1-3                       | 88             | 71      | 17      |
| $\geq 4$                  | 135            | 92      | 43      |
| Tumor diameter            |                |         |         |
| $\leq 20$ mm              | 135            | 109     | 26      |
| $>20$ mm                  | 121            | 72      | 49      |
| Histological grade        |                |         |         |
| I (good)                  | 65             | 58      | 7       |
| II (intermediate)         | 80             | 58      | 22      |
| III (poor)                | 111            | 65      | 46      |
| Estrogen-receptor status  |                |         |         |
| Negative                  | 63             | 37      | 26      |
| Positive                  | 193            | 144     | 49      |
| Surgery                   |                |         |         |
| Breast-conserving therapy | 139            | 105     | 34      |
| Masectomy                 | 117            | 76      | 41      |
| Chemotherapy              |                |         |         |
| No                        | 156            | 106     | 50      |
| Yes                       | 100            | 75      | 25      |
| Hormonal therapy          |                |         |         |
| No                        | 229            | 157     | 72      |
| Yes                       | 27             | 24      | 3       |

Table 3: CNS clinical factors

| Characteristic | No. of samples | class 0 | class 1 |
|----------------|----------------|---------|---------|
|                | 60             | 21      | 39      |
| type           |                |         |         |
| Classic        | 46             | 18      | 28      |
| Desmoplastic   | 14             | 3       | 11      |
| Chang stage    |                |         |         |
| M0             | 8              | 4       | 4       |
| M+             | 2              | 2       | 0       |
| T1M0           | 2              | 1       | 1       |
| T2M0           | 8              | 3       | 5       |
| T2M+           | 4              | 2       | 2       |
| T3bM0          | 6              | 1       | 5       |
| T3bM+          | 3              | 2       | 1       |
| T3M0           | 12             | 1       | 11      |
| T3M+           | 6              | 3       | 3       |
| T4M0           | 6              | 1       | 5       |
| T4M+           | 3              | 1       | 2       |
| gender         |                |         |         |
| Female         | 21             | 7       | 14      |
| Male           | 39             | 14      | 25      |
| Age (months)   |                |         |         |
| < 100          | 38             | 13      | 25      |
| 100-200        | 17             | 4       | 13      |
| $\geq$ 200     | 5              | 4       | 1       |
| Chemo Cx       |                |         |         |
| 0              | 8              | 5       | 3       |
| 1              | 52             | 16      | 36      |
| Chemo VP       |                |         |         |
| 0              | 45             | 14      | 31      |
| 1              | 15             | 7       | 8       |

Table 4: Location variables for each data set

| Characteristic                                  | No. of samples | class 0 | class 1 |
|-------------------------------------------------|----------------|---------|---------|
| Breast                                          |                |         |         |
| No. Positive Nodes * Chemotherapy               | 256            | 181     | 75      |
|                                                 | 5              | 2       | 3       |
|                                                 | 28             | 16      | 12      |
|                                                 | 22             | 16      | 6       |
|                                                 | 66             | 55      | 11      |
|                                                 | 129            | 88      | 41      |
|                                                 | 6              | 4       | 2       |
| Prostate                                        |                |         |         |
| Seminal vesicle invasion * Lymph node involmnet | 79             | 37      | 42      |
|                                                 | 69             | 28      | 41      |
|                                                 | 7              | 6       | 1       |
|                                                 | 3              | 3       | 0       |
| CNS                                             |                |         |         |
| Age * Cx                                        | 60             | 21      | 39      |
|                                                 | 2              | 1       |         |
|                                                 | 36             | 12      | 24      |
|                                                 | 2              | 1       | 1       |
|                                                 | 15             | 3       | 12      |
|                                                 | 5              | 4       | 1       |
