# Supplementary material for: Integrative mixture of experts to combine clinical factors and gene markers
Source: PubMed Central journal article supplement — Bioinformatics. 2010 Mar 11;26(9):1192–8. doi: 10.1093/bioinformatics/btq107 (PMC2859127; doi:10.1093/bioinformatics/btq107), 2010-03-11
Supplement: btq107_4.pdf [file btq107_4.pdf]

**Supplementary Table S4 : prostate data set, genes ranked in decreasing order**

**T test (1)**

| probeset ID | GeneID | Gene Name                                               | Symbol | Expression level in subjects with recurrences |
|-------------|--------|---------------------------------------------------------|--------|-----------------------------------------------|
| 216396_s_at | 9538   | Etoposide induced 2.4 mRNA                              | EI24   | overexpressed                                 |
| 204505_s_at | 2039   | Erythrocyte membrane protein band 4.9 (dematin)         | EPB49  | underexpressed                                |
| 209128_s_at | 9733   | Squamous cell carcinoma antigen recognized by T cells 3 | SART3  | overexpressed                                 |
| 222182_s_at | 4848   | CCR4-NOT transcription complex, subunit 2               | CNOT2  | overexpressed                                 |
| 201933_at   | 5119   | Chromatin modifying protein 1A                          | CHMP1A | underexpressed                                |
| 201611_s_at | 23463  | Isoprenylcysteine carboxyl methyltransferase            | ICMT   | underexpressed                                |
| 201364_s_at | 4947   | Ornithine decarboxylase antizyme 2                      | OAZ2   | overexpressed                                 |
| 211270_x_at | 5725   | Polypyrimidine tract binding protein 1                  | PTBP1  | overexpressed                                 |
| 200873_s_at | 10694  | Chaperonin containing TCP1, subunit 8 (theta)           | CCT8   | overexpressed                                 |
| 218137_s_at | 60682  | Small ArfGAP 1                                          | SMAP1  | overexpressed                                 |
| 212546_s_at | 285527 | FRY-like                                                | FRYL   | overexpressed                                 |
| 202200_s_at | 6732   | SFRS protein kinase 1                                   | SRPK1  | overexpressed                                 |
| 213762_at   | 27316  | RNA binding motif protein, X-linked                     | RBMX   | overexpressed                                 |
| 214743_at   | 1523   | Cut-like homeobox 1                                     | CUX1   | overexpressed                                 |
| 200751_s_at | 3183   | Heterogeneous nuclear ribonucleoprotein C (C1/C2)       | HNRNPC | overexpressed                                 |

**RF (2)**

| probeset ID | GeneID | Gene Name                                             | Symbol  | Expression level in subjects with recurrences |
|-------------|--------|-------------------------------------------------------|---------|-----------------------------------------------|
| 216396_s_at | 9538   | Etoposide induced 2.4 mRNA                            | EI24    | overexpressed                                 |
| 201933_at   | 5119   | Chromatin modifying protein 1A                        | CHMP1A  | underexpressed                                |
| 218294_s_at | 10762  | Nucleoporin 50kDa                                     | NUP50   | overexpressed                                 |
| 205047_s_at | 440    | Asparagine synthetase                                 | ASNS    | overexpressed                                 |
| 208549_x_at | 5757   | Prothymosin, alpha                                    | PTMA    | overexpressed                                 |
| 217902_s_at | 8924   | Hect domain and RLD 2                                 | HERC2   | overexpressed                                 |
| 205094_at   | 5193   | Peroxisomal biogenesis factor 12                      | PEX12   | overexpressed                                 |
| 209394_at   | 8623   | Acetylserotonin O-methyltransferase-like              | ASMTL   | underexpressed                                |
| 203946_s_at | 384    | Arginase, type II                                     | ARG2    | underexpressed                                |
| 221426_s_at | 8392   | Olfactory receptor, family 3, subfamily A, member 3   | OR3A3   | underexpressed                                |
| 200682_s_at | 7332   | Ubiquitin-conjugating enzyme E2L 3                    | UBE2L3  | overexpressed                                 |
| 219343_at   | 55664  | Cell division cycle 37 homolog (S. cerevisiae)-like 1 | CDC37L1 | underexpressed                                |
| 201611_s_at | 23463  | Isoprenylcysteine carboxyl methyltransferase          | ICMT    | underexpressed                                |
| 203431_s_at | 9743   | Rho GTPase-activating protein                         | RICS    | overexpressed                                 |
| 222182_s_at | 4848   | CCR4-NOT transcription complex, subunit 2             | CNOT2   | overexpressed                                 |

**sPLS (3)**

| probeset ID | GeneID | Gene Name                                                                                       | Symbol    | Expression level in subjects with recurrences |
|-------------|--------|-------------------------------------------------------------------------------------------------|-----------|-----------------------------------------------|
| 216396_s_at | 9538   | Etoposide induced 2.4 mRNA                                                                      | EI24      | overexpressed                                 |
| 204505_s_at | 2039   | Erythrocyte membrane protein band 4.9 (dematin)                                                 | EPB49     | underexpressed                                |
| 209128_s_at | 9733   | Squamous cell carcinoma antigen recognized by T cells 3                                         | SART3     | overexpressed                                 |
| 222182_s_at | 4848   | CCR4-NOT transcription complex, subunit 2                                                       | CNOT2     | overexpressed                                 |
| 201933_at   | 5119   | Chromatin modifying protein 1A                                                                  | CHMP1A    | underexpressed                                |
| 212009_s_at | 10963  | Stress-induced-phosphoprotein 1                                                                 | STIP1     | overexpressed                                 |
| 218890_at   | 51318  | Mitochondrial ribosomal protein L35                                                             | MRPL35    | overexpressed                                 |
| 214552_s_at | 9135   | Rabaptin, RAB GTPase binding effector protein 1                                                 | RABEP1    | overexpressed                                 |
| 208132_at   | 7916   | HLA-B associated transcript 2                                                                   | BAT2      | overexpressed                                 |
| 212690_at   | 23259  | DDHD domain containing 2                                                                        | DDHD2     | underexpressed                                |
| 204060_s_at | 5613   | Protein kinase, X-linked                                                                        | PRKX      | overexpressed                                 |
| 218131_s_at | 54815  | GATA zinc finger domain containing 2A                                                           | GATAD2A   | overexpressed                                 |
| 211071_s_at | 10962  | Myeloid/lymphoid or mixed-lineage leukemia (trithorax homolog, Drosophila); translocated to, 11 | MLLT11    | overexpressed                                 |
| 222380_s_at | 391733 | similar to Microneme antigen                                                                    | LOC391733 | overexpressed                                 |
| 204711_at   | 9851   | KIAA0753                                                                                        | KIAA0753  | overexpressed                                 |
