# Supplementary material for: Integrative mixture of experts to combine clinical factors and gene markers
Source: PubMed Central journal article supplement — Bioinformatics. 2010 Mar 11;26(9):1192–8. doi: 10.1093/bioinformatics/btq107 (PMC2859127; doi:10.1093/bioinformatics/btq107), 2010-03-11
Supplement: btq107_5.pdf [file btq107_5.pdf]

**Supplementary Table S5 : breast dataset analysis, genes ranked in decreasing order****T test (1)**

| Genbank/Refseq ID | GeneID | Gene Name                                                    | Symbol         | Expression level in subjects with recurrences |
|-------------------|--------|--------------------------------------------------------------|----------------|-----------------------------------------------|
| AF055033          | 3488   | Insulin-like growth factor binding protein5                  | <b>IGFBP5</b>  | overexpressed                                 |
| NM_000291         | 5230   | Phosphoglycerate mutase 1                                    | <b>PGK1</b>    | overexpressed                                 |
| NM_000599         | 3488   | Insulin-like growth factor binding protein5                  | <b>IGFBP5</b>  | overexpressed                                 |
| NM_017761         | 55629  | Proline-rich nuclear receptor coactivator 2                  | <b>PNRC2</b>   | underexpressed                                |
| NM_003981         | 9055   | Protein regulator of cytokinesis 1                           | <b>PRC1</b>    | underexpressed                                |
| NM_014635         | 9648   | Grip and coiled-coil domain containing 2                     | <b>GCC2</b>    | underexpressed                                |
| NM_002466         | 4605   | V-myb myelobalstosis viral oncogene homolog (avian)-like 2   | <b>MYBL2</b>   | overexpressed                                 |
| AA843540          | 143686 | Sestrin 3                                                    | <b>SESN3</b>   | underexpressed                                |
| L27560            | 3488   | Insulin-like growth factor binding protein5                  | <b>IGFBP5</b>  | overexpressed                                 |
| NM_000365         | 7167   | Triosephosphate isomerase 1                                  | <b>TPI1</b>    | overexpressed                                 |
| AL050101          | 25839  | Component of oligomeric golgi complex 4                      | <b>COG4</b>    | overexpressed                                 |
| NM_002691         | 5424   | Polymerase (DNA directed), delta 1, catalytic subunit 125kDa | <b>POLD1</b>   | overexpressed                                 |
| M96577            | 1869   | E2F transcription factor 1                                   | <b>E2F1</b>    | overexpressed                                 |
| Contig63026       | 285958 | Chromosome 7 open reading frame 40                           | <b>C7ORF40</b> | overexpressed                                 |
| NM_003258         | 7083   | Thymidine kinase 1                                           | <b>TK1</b>     | overexpressed                                 |

**RF (2)**

| Genbank/Refseq ID | GeneID | Gene Name                                                    | Symbol          | Expression level in subjects with recurrences |
|-------------------|--------|--------------------------------------------------------------|-----------------|-----------------------------------------------|
| AF070577          | 4978   | Opioid binding protein/cell adhesion molecule-like           | <b>OPCML</b>    | overexpressed                                 |
| NM_000365         | 7167   | Triosephosphate isomerase 1                                  | <b>TPI1</b>     | overexpressed                                 |
| NM_002691         | 5424   | Polymerase (DNA directed), delta 1, catalytic subunit 125kDa | <b>POLD1</b>    | overexpressed                                 |
| NM_014635         | 9648   | Grip and coiled-coil domain containing 2                     | <b>GCC2</b>     | underexpressed                                |
| AF055033          | 3488   | Insulin-like growth factor binding protein5                  | <b>IGFBP5</b>   | overexpressed                                 |
| NM_001124         | 133    | Adrenomedullin                                               | <b>ADM</b>      | overexpressed                                 |
| NM_017761         | 55629  | Proline-rich nuclear receptor coactivator 2                  | <b>PNRC2</b>    | underexpressed                                |
| NM_000599         | 3488   | Insulin-like growth factor binding protein5                  | <b>IGFBP5</b>   | overexpressed                                 |
| NM_002466         | 4605   | V-myb myelobalstosis viral oncogene homolog (avian)-like 2   | <b>MYBL2</b>    | overexpressed                                 |
| NM_000024         | 154    | Adrenergic, beta-2-, receptor, surface                       | <b>ADRB2</b>    | underexpressed                                |
| NM_000291         | 5230   | Phosphoglycerate mutase 1                                    | <b>PGK1</b>     | overexpressed                                 |
| NM_003981         | 9055   | Protein regulator of cytokinesis 1                           | <b>PRC1</b>     | overexpressed                                 |
| L27560            | 3488   | Insulin-like growth factor binding protein5                  | <b>IGFBP5</b>   | overexpressed                                 |
| NM_016109         | 51129  | Angiopietin-like 4                                           | <b>ANGPTL4</b>  | overexpressed                                 |
| NM_003920         | 8914   | Timeless homolog (Drosophila)                                | <b>TIMELESS</b> | overexpressed                                 |

**sPLS (3)**

| Genbank/Refseq ID | GeneID | Gene Name                                              | Symbol          | Expression level in subjects with recurrences |
|-------------------|--------|--------------------------------------------------------|-----------------|-----------------------------------------------|
| AF055033          | 3488   | Insulin-like growth factor binding protein5            | <b>IGFBP5</b>   | overexpressed                                 |
| NM_000291         | 5230   | Phosphoglycerate mutase 1                              | <b>PGK1</b>     | overexpressed                                 |
| NM_000599         | 3488   | Insulin-like growth factor binding protein5            | <b>IGFBP5</b>   | overexpressed                                 |
| NM_017761         | 55629  | Proline-rich nuclear receptor coactivator 2            | <b>PNRC2</b>    | underexpressed                                |
| NM_003981         | 9055   | Protein regulator of cytokinesis 1                     | <b>PRC1</b>     | overexpressed                                 |
| NM_000958         | 5734   | Prostaglandin E receptor 4 (subtype EP4)               | <b>PTGER4</b>   | underexpressed                                |
| NM_018089         | 55139  | Ankyrin repeat and zinc finger domain containing 1     | <b>ANKZF1</b>   | overexpressed                                 |
| NM_005133         | 9986   | RCE1 homolog, prenyl protein peptidase (S. cerevisiae) | <b>RCE1</b>     | overexpressed                                 |
| AI937446          | 285958 | Chromosome 7 open reading frame 40                     | <b>C7orf40</b>  | overexpressed                                 |
| NM_003920         | 8914   | Timeless homolog (Drosophila)                          | <b>TIMELESS</b> | overexpressed                                 |
| AA609684          |        | clone IMAGE:1031838                                    |                 | underexpressed                                |
| NM_020978         | 280    | Amylase, alpha 2B (pancreatic)                         | <b>AMY2B</b>    | underexpressed                                |
| NM_016628         | 51322  | WW domain containing adaptor with coiled-coil          | <b>WAC</b>      | overexpressed                                 |
| AL137363          |        | clone DKFZp434D1026                                    |                 | underexpressed                                |
| AI016183          | 162466 | Phosphatase, orphan 1                                  | <b>PHOSPHO1</b> | overexpressed                                 |
