# Supplementary material for: Integrative mixture of experts to combine clinical factors and gene markers
Source: PubMed Central journal article supplement — Bioinformatics. 2010 Mar 11;26(9):1192–8. doi: 10.1093/bioinformatics/btq107 (PMC2859127; doi:10.1093/bioinformatics/btq107), 2010-03-11
Supplement: btq107_6.pdf [file btq107_6.pdf]

**Supplementary Table S6 : CNS dataset analysis, genes ranked in decreasing order**

**T test (1)**

| Probeset ID    | GeneID | Gene Name                                                  | Symbol   | Expression level in subjects with recurrences |
|----------------|--------|------------------------------------------------------------|----------|-----------------------------------------------|
| D28473-s-at    | 3376   | Isoleucine-tRNA synthetase                                 | IARS     | overexpressed                                 |
| L17131-rna1-at | 3159   | High mobility group AT-hook 1                              | HMGA1    | overexpressed                                 |
| U07563-cds1-at | 25     | C-abl oncogene 1, receptor tyrosine kinase                 | ABL1     | overexpressed                                 |
| U08998-at      | 6895   | TAR (HIV-1) RNA binding protein 2                          | TARBP2   | overexpressed                                 |
| X74801-at      | 7203   | Chaperonin containing TCP1, subunit 3 (gamma)              | CCT3     | overexpressed                                 |
| D28124-at      |        | Unknown protein                                            |          | underexpressed                                |
| X13293-at      | 4605   | V-myb myeloblastosis viral oncogene homolog (avian)-like 2 | MYBL2    | overexpressed                                 |
| U95740-rna2-at | 9665   | KIAA0430                                                   | KIAA0430 | underexpressed                                |
| U50136-rna1-at | 4056   | Leukotriene C4 synthase                                    | LTC4S    | underexpressed                                |
| M73547-at      | 7905   | Receptor accessory protein 5                               | REEP5    | underexpressed                                |
| Y09616-at      | 8824   | Carboxylesterase 2 (intestine, liver)                      | CES2     | underexpressed                                |
| X76302-at      | 11017  | Small nuclear ribonucleoprotein 27kDa (U4/U6.U5)           | SNRNP27  | underexpressed                                |
| U79256-at      | 84986  | Rho GTPase activating protein 19                           | ARHGAP19 | overexpressed                                 |
| U82306-at      |        | Unknown protein                                            |          | overexpressed                                 |
| J02611-at      | 347    | Apolipoprotein D                                           | APOD     | underexpressed                                |

**RF (2)**

| Probeset ID    | GeneID | Gene Name                                                                                       | Symbol    | Expression level in subjects with recurrences |
|----------------|--------|-------------------------------------------------------------------------------------------------|-----------|-----------------------------------------------|
| D28473-s-at    | 3376   | Isoleucine-tRNA synthetase                                                                      | IARS      | overexpressed                                 |
| M18728-at      | 4680   | Carcinoembryonic antigen-related cell adhesion molecule 6 (non-specific cross reacting antigen) | CEACAM6   | overexpressed                                 |
| U08998-at      | 6895   | TAR (HIV-1) RNA binding protein 2                                                               | TARBP2    | overexpressed                                 |
| L15189-s-at    | 3313   | Heat shock 70kDa protein 9 (mortalin)                                                           | HSPA9     | overexpressed                                 |
| M73547-at      | 7905   | Receptor accessory protein 5                                                                    | REEP5     | underexpressed                                |
| Y09616-at      | 8824   | Carboxylesterase 2 (intestine, liver)                                                           | CES2      | underexpressed                                |
| U30827-s-at    | 6430   | Splicing factor, arginine/serine-rich 5                                                         | SFRS5     | underexpressed                                |
| L17131-rna1-at | 3159   | High mobility group AT-hook 1                                                                   | HMGA1     | overexpressed                                 |
| L20688-at      | 397    | Rho GDP dissociation inhibitor (GDI) beta                                                       | ARHGDI2   | underexpressed                                |
| D00591-at      | 1104   | Regulator of chromosome condensation 1                                                          | CHC1/RCC1 | overexpressed                                 |
| U79256-at      | 84986  | Rho GTPase activating protein 19                                                                | ARHGAP19  | overexpressed                                 |
| D28124-at      |        | Unknown protein                                                                                 |           | underexpressed                                |
| S78296-at      | 9118   | Internexin neuronal intermediate filament protein, alpha                                        | INA       | underexpressed                                |
| U40271-s-at    | 5754   | Protein-tyrosine kinase 7                                                                       | PTK7      | underexpressed                                |
| L05500-at      | 107    | Adenylate cyclase 1 (brain)                                                                     | ADCY1     | overexpressed                                 |
| AF009301-at    | 10299  | Membrane-associated ring finger (C3HC4) 6                                                       | MARCH6    | underexpressed                                |

**sPLS (3)**

| Probeset ID      | GeneID | Gene Name                                                                                         | Symbol  | Expression level in subjects with recurrences |
|------------------|--------|---------------------------------------------------------------------------------------------------|---------|-----------------------------------------------|
| D28473-s-at      | 3376   | Isoleucine-tRNA synthetase                                                                        | IARS    | overexpressed                                 |
| L17131-rna1-at   | 3159   | High mobility group AT-hook 1                                                                     | HMGA1   | overexpressed                                 |
| U07563-cds1-at   | 25     | C-abl oncogene 1, receptor tyrosine kinase                                                        | ABL1    | overexpressed                                 |
| U08998-at        | 6895   | TAR (HIV-1) RNA binding protein 2                                                                 | TARBP2  | overexpressed                                 |
| X74801-at        | 7203   | Chaperonin containing TCP1, subunit 3 (gamma)                                                     | CCT3    | overexpressed                                 |
| HG4185-HT4455-at | 6783   | Sulfotransferase family 1E, estrogen-preferring, member 1                                         | SULT1E1 | overexpressed                                 |
| U29175-at        | 6597   | SWI/SNF related, matrix associated, actin dependent regulator of chromatin, subfamily a, member 4 | SMARCA4 | underexpressed                                |
| X76302-at        | 11017  | Small nuclear ribonucleoprotein 27kDa (U4/U6.U5)                                                  | SNRNP27 | underexpressed                                |
| M20747-s-at      | 6517   | Solute carrier family 2 (facilitated glucose transporter), member 4                               | SLC2A4  | overexpressed                                 |
| HG2290-HT2386-at | 796    | Calcitonin-related polypeptide alpha                                                              | CALCA   | overexpressed                                 |
| Y09305-at        | 8798   | Dual-specificity tyrosine-(Y)-phosphorylation regulated kinase 4                                  | DYRK4   | underexpressed                                |
| L07493-at        | 5888   | RAD51 homolog (RecA homolog, E. coli) (S. cerevisiae)                                             | RAD51   | underexpressed                                |
| L09717-at        | 3920   | Lysosomal-associated membrane protein 2                                                           | LAMP2   | overexpressed                                 |
| D86549-at        | 10428  | Craniofacial development protein 1                                                                | CFDP1   | underexpressed                                |
| U75276-s-at      | 2972   | BRF1 homolog, subunit of RNA polymerase III transcription initiation factor IIIB (S. cerevisiae)  | BRF1    | underexpressed                                |
